# Supplementary material
Source: publisher figshare collection journal article supplement (https://karger.figshare.com/ndownloader/files/15049625)
Supplement: Supplementary file 1 [file 15049625]

| Table S1: Important characteristics of the included studies | | | | | | | | | | | | | |
| --- | --- | --- | --- | --- | --- | --- | --- | --- | --- | --- | --- | --- | --- |
| Study | **n** | **Design** | **Diagnosis** | **Study arm** | **Follow-up observation** | **Pregnant** | **Followup (months)** | **CIN2** | **CIN3** | **% HPV positive** | **Age** | **% Smokers** | **% using Contraceptive** |
| Discacciati 2011 [20] | 42 | PROSP | Biopsy/LSIL | Expectant management | Colposcopy, cervical smear | No | 12 | 42 |  |  | 26.5±7.5 |  |  |
| Fuchs 2007 [21] | 40 | RET | Biopsy/LSIL, HSIL, ASCUS, ASC-HSIL, | Colposcopic follow-up | Cervical cytology, cervical-vaginal HPV test | Yes | 36 | 40 |  |  | 14±6 | 45 |  |
| Garcia 2004 [22] | 127 | DB-RCT | Colposcopic punch biopsy, HPV test | Placebo | Colposcopy, cervical smear, HPV test | No | 6 |  |  | 41.73 | 27±6 | 49 | 55 |
| Grimm 2012 [23] | 29 | RCT | Colposcopic biopsy, HPV test | Placebo | Colposcopy, cervical smear, HPV test | No | 4 | 13 | 16 | 100 | 31.8±7.3 | 66 | 100 |
| Guedes 2007 [24] | 45 | RCT | Colposcopic biopsy, HPV test | Colposcopic follow-up | Colposcopy | NR | 12 | 45 |  | 100 |  |  |  |
| Kaufmann 2007 [25] | 13 | RCT | Colposcopic biopsy, HPV test | Placebo | Colposcopy, cervical smear | No | 12 | 6 | 6 | 100 | 29.3±5.9 |  |  |
| Keefe 2001 [26] | 52 | RCT | Colposcopic biopsy | Placebo | Colposcopy, cervical smear | No | 24 | 20 | 32 | 55 |  | 33 |  |
| McAllum 2011 [27] | 157 | RET | Colposcopic biopsy | Conservative management | Colposcopy, cervical smear | NR | 8 | 157 |  |  | 20.9 | 42.04 |  |
| Munk 2012 [28] | 162 | PROSP | Biopsy/LSIL, HSIL, ASCUS-HCIL, HPV | Colposcopic follow-up | Colposcopy, cervical smear | No | 4 |  |  | 89.51 | 32±3 |  | 50 |
| Nishio 2013 [29] | 131 | RET | Colposcopic biopsy, HPV test | Colposcopic follow-up | Colposcopy, cervical smear | NR | 40 | 60 | 102 | 100 | 37±15 |  |  |
| Rahangdale 2014 [30] | 29 | RCT | Colposcopic biopsy | Observation | Colposcopy, cervical smear, HPV test | No | 6 | 29 |  |  | 23±2 | 27.6 | 82.3 |
| Trimble 2015 [31] | 42 | RCT | Colposcopic biopsy, HPV test | Placebo | Colposcopy, cervical smear, HPV test | No | 9 | 11 | 31 | 100 | 31.6±9.3 |  |  |
| Vlahos 2003 [32] | 78 | RET | Biopsy/ASCUS, AGUS | Observation | Colposcopy, cervical smear | Yes | 4 |  |  |  | 28±4.2 |  |  |
| Vlastos 2005 [33] | 47 | RCT | Biopsy/Papanicolaou smear, endocervical curettage | Placebo | Colposcopy | No | 1 | 12 | 28 | 70 | 31±9.6 | 30 |  |
| Wilkinson 2012 [34] | 405 | RET |  | Colposcopic follow-up | Colposcopy | NR | 48 | 405 |  |  |  | 36 |  |
| Yost 1999 [35] | 82 | RET |  | Colposcopic follow-up | Colposcopy | Yes | 12 | 82 |  | 1 | 24±6.9 |  |  |
| Abbreviations: ASCUS, atypical squamous cells of undetermined significance; ASGUS, atypical glandular cells of undetermined significance; CIN, cervical intraepithelial neoplasia; HSIl/LSIL, high/low-grade squamous intraepithelial lesion; HPV, human papillomavirus; PROSP, prospective; RCT, randomized controlled trial; RET, retrospective; NR, not reported. | | | | | | | | | | | | | |

| Tables S2: Quality assessment of the included study with New Castle-Ottawa Quality Assessment Scale | | | | | | | | |
| --- | --- | --- | --- | --- | --- | --- | --- | --- |
| Study | **Representativeness of exposed cohort** | **Selection of non-exposed cohort** | **Ascertainment of exposure** | **Demonstration that outcome of interest was not present at start of study** | **Comparability of cohorts on the basis of the design or analysis** | **Assessment of outcome** | **Was follow-up long enough for outcomes to occur** | **Adequacy of follow up completion of cohorts** |
| Discacciati 2011 [20] | * |  | * | NA |  | * | * | * |
| Fuchs 2007 [21] | * |  | * | NA |  | * | * | * |
| Garcia 2004 [22] | * | * | * | NA | * | * |  | * |
| Grimm 2012 [23] | * | * | * | NA | * | * |  | * |
| Guedes 2007 [24] | * | * | * | NA | * | * | * | * |
| Kaufmann 2007 [25] | * | * | * | NA | * | * | * | * |
| Keefe 2001 [26] | * | * | * | NA | * | * | * | * |
| McAllum 2011 [27] | * |  | * | NA |  | * | * | * |
| Munk 2012 [28] | * |  | * | NA |  | * |  | * |
| Nishio 2013 [29] | * |  | * | NA |  | * | * | * |
| Rahangdale 2014 [30] | * | * | * | NA | * | * |  | * |
| Trimble 2015 [31] | * | * | * | NA | * | * | * | * |
| Vlahos 2003 [32] | * |  | * | NA |  | * |  | * |
| Vlastos 2005 [33] | * | * | * | NA | * | * |  | * |
| Wilkinson 2012 [34] | * |  | * | NA |  | * | * | * |
| Yost 1999 [35] | * |  | * | NA |  | * | * | * |

**Criteria**

| Selection | Comparability | Outcome |
| --- | --- | --- |
| 1) Representativeness of the exposed cohort  a) truly representative of the average _______________ (describe) in the community   b) somewhat representative of the average ______________ in the community   c) selected group of users e.g. nurses, volunteers  d) no description of the derivation of the cohort  2) Selection of the non-exposed cohort  a) drawn from the same community as the exposed cohort   b) drawn from a different source  c) no description of the derivation of the non-exposed cohort  3) Ascertainment of exposure  a) secure record (e.g. surgical records)   b) structured interview   c) written self-report  d) no description  4) Demonstration that outcome of interest was not present at start of study  a) yes   b) no | 1) Comparability of cohorts on the basis of the design or analysis  a) study controls for _____________ (select the most important factor) ****  b) study controls for any additional factor **** (This criterion could be modified to indicate specific control for a second important factor.) | 1) Assessment of outcome  a) independent blind assessment ****  b) record linkage ****  c) self-report  d) no description  2) Was follow-up long enough for outcomes to occur  a) yes (select an adequate follow up period for outcome of interest) ****  b) no  3) Adequacy of follow up of cohorts  a) complete follow up - all subjects accounted for ****  b) subjects lost to follow up unlikely to introduce bias - small number lost - > ____ % (select an adequate %) follow up, or description provided of those lost) ****  c) follow up rate < ____% (select an adequate %) and no description of those lost  d) no statement |

Note: A study can be awarded a maximum of one star for each numbered item within the Selection and Outcome categories. A maximum of two stars can be given for Comparability


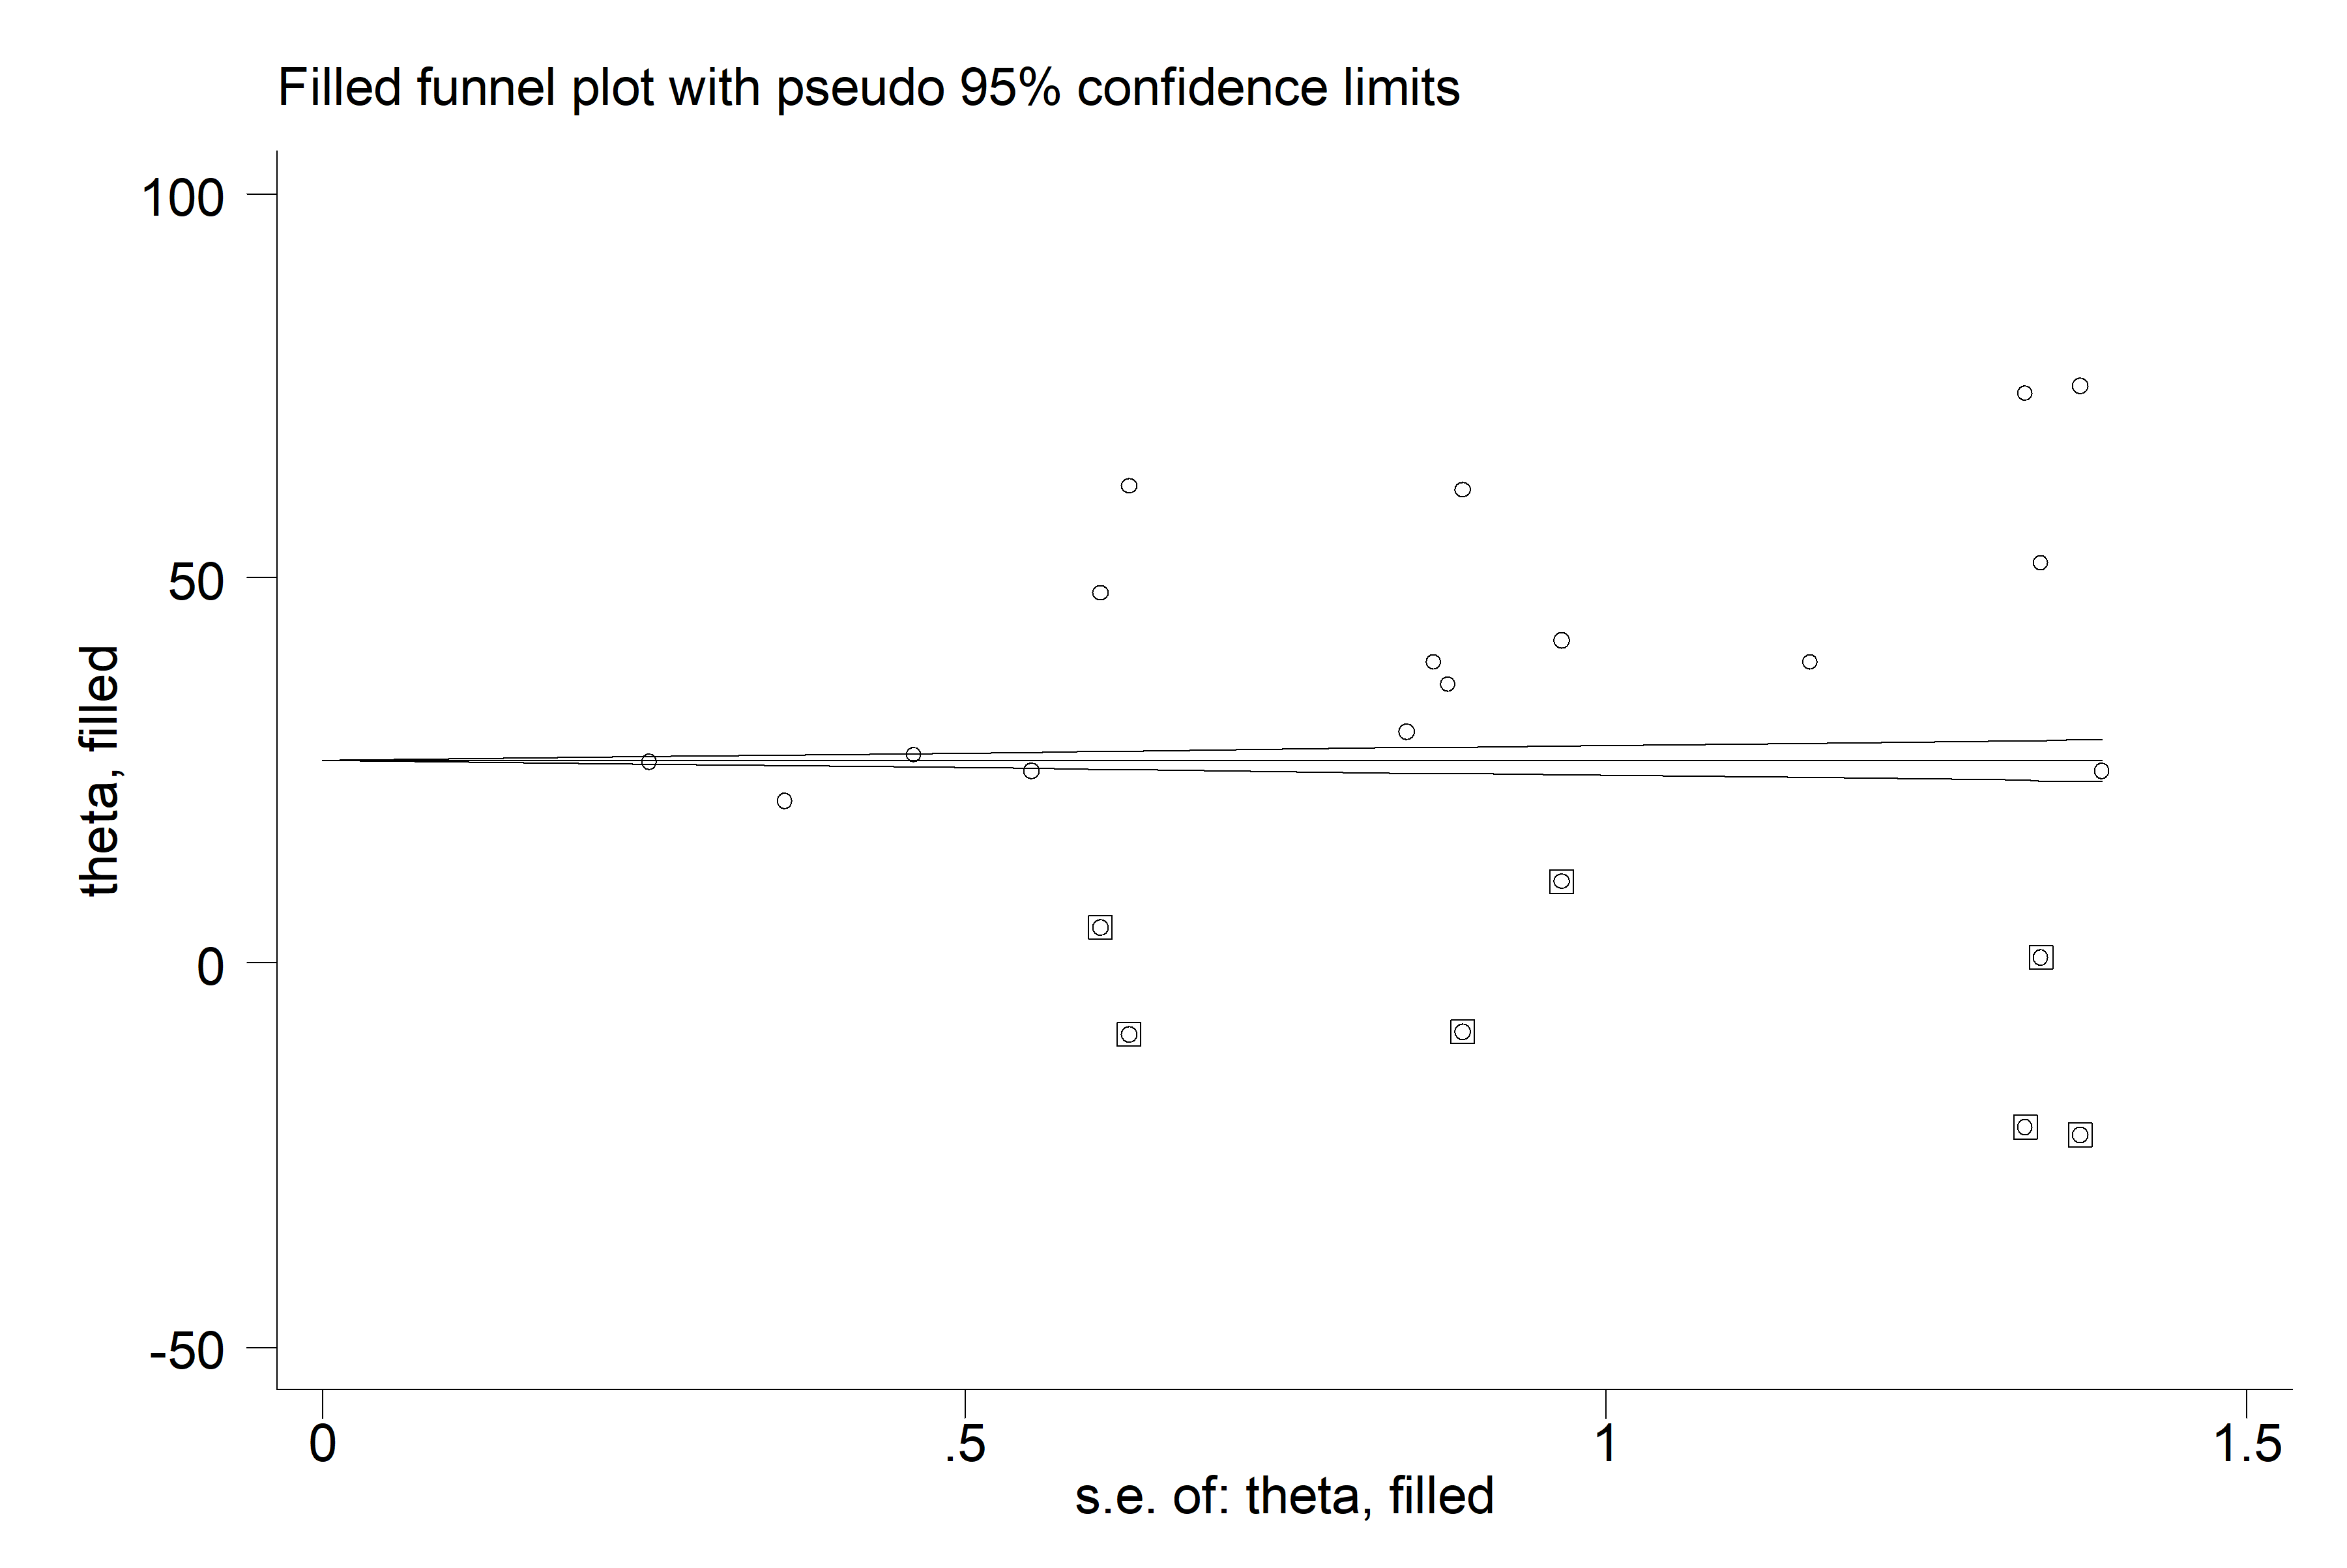


**Figure S1: A funnel plot showing a significant publication bias. Circles within boxes show possible missing studies estimated by trim and fill method. Thetha represent percent regression rate**


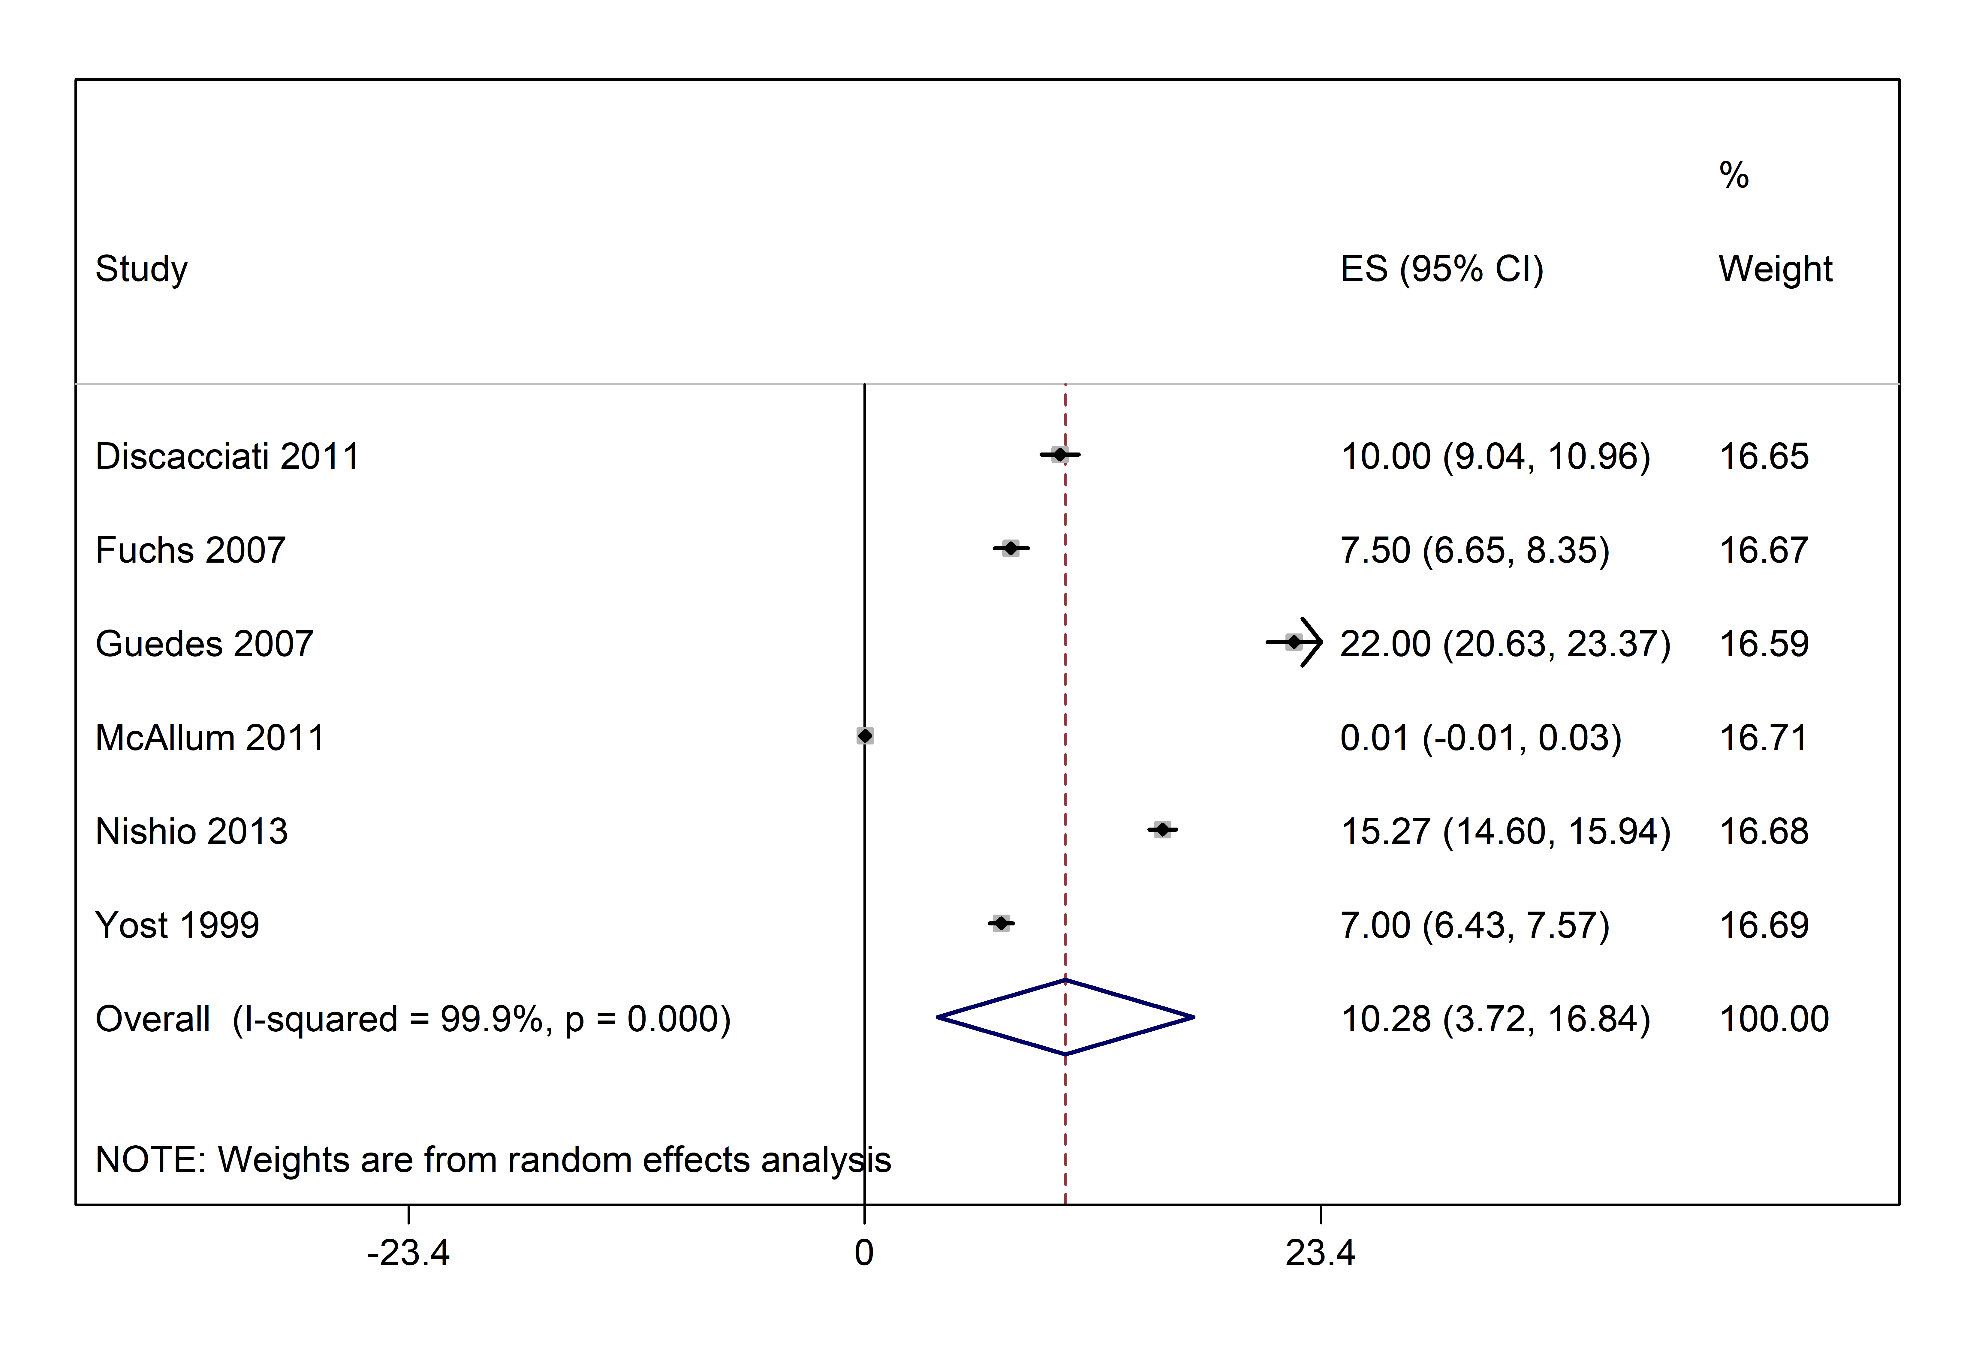


**Figure S2: A forest graph showing the outcomes of the meta-analysis of percent progression rate of CIN 2**
